# Supplementary material
Source: MDPI journal article supplement (https://www.mdpi.com/2076-0760/12/10/546)
Supplement: s1 [file s1]

## Supplementary material

Supplementary Table S1. Percentage of burnout cases according to sociodemographic groups.

| SEX                                                |                   |                |       |              |
|----------------------------------------------------|-------------------|----------------|-------|--------------|
|                                                    | Female            | Male           | Total | P            |
| Single-item 'inclusive'                            | 29.6%             | 28.6%          | 29.3% | 0.465        |
| Single-item 'strict'                               | 7.7%              | 3.4%           | 6.5%  | 0.072        |
| BBQ factor 2                                       | 27.3%             | 34.5%          | 29.3% | 0.092        |
| AGE                                                |                   |                |       |              |
|                                                    | Under 50          | Over 50        | Total | P            |
| Single-item 'inclusive'                            | 26.4%             | 34.2%          | 30.3% | <b>0.024</b> |
| Single-item 'strict'                               | 4.1%              | 8.9%           | 6.5%  | <b>0.014</b> |
| BBQ factor 2                                       | 26.7%             | 36.0%          | 31.3% | <b>0.018</b> |
| PROFESSIONAL GROUP: HEALTH/NON-HEALTH              |                   |                |       |              |
|                                                    | Non-health        | Health         | Total | P            |
| Single-item 'inclusive'                            | 22.3%             | 33.7%          | 30.5% | <b>0.005</b> |
| Single-item 'strict'                               | 3.4%              | 7.8%           | 6.5%  | <b>0.033</b> |
| BBQ factor 2                                       | 21.7%             | 35.7%          | 31.5% | <b>0.000</b> |
| PROFESSIONAL GROUP: CONTACT WITH PUBLIC/NO CONTACT |                   |                |       |              |
|                                                    | No public contact | Public contact | Total | P            |
| Single-item 'inclusive'                            | 25.7%             | 31.9%          | 30.5% | 0.101        |
| Single-item 'strict'                               | 2.2%              | 7.8%           | 6.5%  | <b>0.012</b> |
| BBQ factor 2                                       | 25.0%             | 33.5%          | 31.5% | <b>0.038</b> |
| CARE LEVEL                                         |                   |                |       |              |
|                                                    | Primary care      | Hospital       | Total | P            |
| Single-item 'inclusive'                            | 30.5%             | 30.1%          | 30.2% | 0.519        |
| Single-item 'strict'                               | 8.5%              | 5.7%           | 6.1%  | 0.220        |
| BBQ factor 2                                       | 40.2%             | 29.6%          | 31.4% | <b>0.040</b> |
